# Supplementary material
Source: publisher figshare collection journal article supplement (https://acs.figshare.com/ndownloader/files/3990910)
Supplement: Supplementary file 1 [file 3990910]

 
data_Ho2CuTe2S2O14_298K 
 
_audit_creation_method            SHELXL-97 
_chemical_name_systematic 
; 
 ? 
; 
_chemical_name_common             'Holmium copper tellurite sulfate' 
_chemical_melting_point           'N//A' 
_chemical_formula_moiety          Ho2Cu(TeO3)2(SO4)2  
_chemical_formula_sum 
 'Cu Ho2 O14 S2 Te2' 
_chemical_formula_weight          936.72 
 
loop_ 
 _atom_type_symbol 
 _atom_type_description 
 _atom_type_scat_dispersion_real 
 _atom_type_scat_dispersion_imag 
 _atom_type_scat_source 
 'O'  'O'   0.0106   0.0060 
 'International Tables Vol C Tables 4.2.6.8 and 6.1.1.4' 
 'S'  'S'   0.1246   0.1234 
 'International Tables Vol C Tables 4.2.6.8 and 6.1.1.4' 
 'Cu'  'Cu'   0.3201   1.2651 
 'International Tables Vol C Tables 4.2.6.8 and 6.1.1.4' 
 'Te'  'Te'  -0.5308   1.6751 
 'International Tables Vol C Tables 4.2.6.8 and 6.1.1.4' 
 'Ho'  'Ho'  -0.2175   4.6783 
 'International Tables Vol C Tables 4.2.6.8 and 6.1.1.4' 
 
_symmetry_cell_setting            'triclinic' 
_symmetry_space_group_name_H-M    'P-1'
 
loop_ 
 _symmetry_equiv_pos_as_xyz 
 'x, y, z' 
 '-x, -y, -z' 
 
_cell_length_a                    5.179(4) 
_cell_length_b                    7.814(6) 
_cell_length_c                    8.108(6) 
_cell_angle_alpha                 62.793(6) 
_cell_angle_beta                  73.836(7) 
_cell_angle_gamma                 85.241(7) 
_cell_volume                      279.9(4) 
_cell_formula_units_Z             1 
_cell_measurement_temperature     298(2) 
_cell_measurement_reflns_used     1289 
_cell_measurement_theta_min       2.93 
_cell_measurement_theta_max       27.470
 
_exptl_crystal_description        'block' 
_exptl_crystal_colour             'light green' 
_exptl_crystal_size_max           0.100 
_exptl_crystal_size_mid           0.080 
_exptl_crystal_size_min           0.020 
_exptl_crystal_density_meas       'N/A' 
_exptl_crystal_density_diffrn     5.557 
_exptl_crystal_density_method     'not measured' 
_exptl_crystal_F_000              411 
_exptl_absorpt_coefficient_mu     21.442 
_exptl_absorpt_correction_type    'numerical' 
_exptl_absorpt_correction_T_min   0.139 
_exptl_absorpt_correction_T_max   0.651
_exptl_absorpt_process_details    'SHELTXPREP'
 
_exptl_special_details 
; 
 ? 
; 
 
_diffrn_ambient_temperature       298(2) 
_diffrn_radiation_wavelength      0.71073 
_diffrn_radiation_type            MoK\a 
_diffrn_radiation_source          'Imus microfocused' 
_diffrn_radiation_monochromator   'Quazar optics' 
_diffrn_measurement_device_type   'BRUKER apex II'
_diffrn_measurement_method        '0.5 wide w/ exposures'
_diffrn_detector_area_resol_mean  0 
_diffrn_reflns_number             3255 
_diffrn_reflns_av_R_equivalents   0.0184 
_diffrn_reflns_av_sigmaI/netI     0.0194 
_diffrn_reflns_limit_h_min        -6 
_diffrn_reflns_limit_h_max        6 
_diffrn_reflns_limit_k_min        -9 
_diffrn_reflns_limit_k_max        10 
_diffrn_reflns_limit_l_min        -10 
_diffrn_reflns_limit_l_max        10 
_diffrn_reflns_theta_min          2.93 
_diffrn_reflns_theta_max          27.47 
_reflns_number_total              1263 
_reflns_number_gt                 1253 
_reflns_threshold_expression      >2sigma(I) 
 
_computing_data_collection        'smart' 
_computing_cell_refinement        'smart saint'
_computing_data_reduction         'SAINT'
_computing_structure_solution     'SHELXS-97 (Sheldrick, 1990)' 
_computing_structure_refinement   'SHELXL-97 (Sheldrick, 1997)' 
_computing_molecular_graphics     'SHELXP-97 (Sheldrick, 1997)' 
_computing_publication_material   'SHELXCIF-97 (Sheldrick, 2000)'
 
_refine_special_details 
; 
 Refinement of F^2^ against ALL reflections.  The weighted R-factor wR and 
 goodness of fit S are based on F^2^, conventional R-factors R are based 
 on F, with F set to zero for negative F^2^. The threshold expression of 
 F^2^ > 2sigma(F^2^) is used only for calculating R-factors(gt) etc. and is 
 not relevant to the choice of reflections for refinement.  R-factors based 
 on F^2^ are statistically about twice as large as those based on F, and R- 
 factors based on ALL data will be even larger. 
; 
 
_refine_ls_structure_factor_coef  Fsqd  
_refine_ls_matrix_type            full 
_refine_ls_weighting_scheme       calc  
_refine_ls_weighting_details 
 'calc w=1/[\s^2^(Fo^2^)+(0.0236P)^2^+2.7356P] where P=(Fo^2^+2Fc^2^)/3' 
_atom_sites_solution_primary      direct 
_atom_sites_solution_secondary    difmap 
_atom_sites_solution_hydrogens    none 
_refine_ls_hydrogen_treatment     none 
_refine_ls_extinction_method      none 
_refine_ls_extinction_coef        ? 
_refine_ls_number_reflns          1263 
_refine_ls_number_parameters      97 
_refine_ls_number_restraints      0 
_refine_ls_R_factor_all           0.0206 
_refine_ls_R_factor_gt            0.0204 
_refine_ls_wR_factor_ref          0.0519 
_refine_ls_wR_factor_gt           0.0517 
_refine_ls_goodness_of_fit_ref    1.105 
_refine_ls_restrained_S_all       1.105 
_refine_ls_shift/su_max           0.000 
_refine_ls_shift/su_mean          0.000 
 
loop_ 
 _atom_site_label 
 _atom_site_type_symbol 
 _atom_site_fract_x 
 _atom_site_fract_y 
 _atom_site_fract_z 
 _atom_site_U_iso_or_equiv 
 _atom_site_adp_type 
 _atom_site_occupancy 
 _atom_site_symmetry_multiplicity 
 _atom_site_calc_flag 
 _atom_site_refinement_flags 
 _atom_site_disorder_assembly 
 _atom_site_disorder_group 
Ho1 Ho 1.07246(5) 0.25035(3) 0.01915(3) 0.00871(9) Uani 1 1 d . . . 
Te1 Te 0.50975(7) 0.27137(5) 0.34442(5) 0.00993(10) Uani 1 1 d . . . 
Cu1 Cu 0.0000 0.0000 0.5000 0.01187(19) Uani 1 2 d S . . 
S1 S -0.2509(3) 0.25265(19) 0.74687(19) 0.0114(3) Uani 1 1 d . . . 
O7 O -0.1360(9) 0.4156(6) 0.7563(6) 0.0187(9) Uani 1 1 d . . . 
O4 O -0.1371(9) 0.2515(6) 0.5626(6) 0.0161(8) Uani 1 1 d . . . 
O6 O -0.5473(8) 0.2641(6) 0.7833(6) 0.0169(8) Uani 1 1 d . . . 
O5 O -0.1779(9) 0.0782(6) 0.9079(6) 0.0159(8) Uani 1 1 d . . . 
O3 O 0.7469(8) 0.4388(5) 0.1095(5) 0.0108(7) Uani 1 1 d . . . 
O2 O 0.2730(8) 0.1879(6) 0.2551(6) 0.0127(8) Uani 1 1 d . . . 
O1 O 0.7474(8) 0.0721(6) 0.3427(5) 0.0109(7) Uani 1 1 d . . . 
 
loop_ 
 _atom_site_aniso_label 
 _atom_site_aniso_U_11 
 _atom_site_aniso_U_22 
 _atom_site_aniso_U_33 
 _atom_site_aniso_U_23 
 _atom_site_aniso_U_13 
 _atom_site_aniso_U_12 
Ho1 0.00885(13) 0.00773(14) 0.01041(13) -0.00473(10) -0.00294(9) 0.00106(9) 
Te1 0.00834(17) 0.01111(18) 0.01142(17) -0.00612(14) -0.00254(13) 0.00076(13) 
Cu1 0.0107(4) 0.0123(5) 0.0118(4) -0.0043(4) -0.0037(4) 0.0001(3) 
S1 0.0093(6) 0.0086(6) 0.0130(6) -0.0014(5) -0.0043(5) 0.0007(5) 
O7 0.029(2) 0.0109(19) 0.018(2) -0.0055(17) -0.0102(18) -0.0016(17) 
O4 0.0164(19) 0.018(2) 0.016(2) -0.0094(17) -0.0032(16) 0.0010(16) 
O6 0.0109(19) 0.021(2) 0.018(2) -0.0095(17) -0.0012(16) 0.0033(16) 
O5 0.022(2) 0.0105(19) 0.0154(19) -0.0045(16) -0.0081(17) 0.0032(16) 
O3 0.0101(17) 0.0085(18) 0.0112(18) -0.0040(15) 0.0008(14) -0.0014(14) 
O2 0.0112(18) 0.0125(19) 0.0158(19) -0.0056(16) -0.0062(15) -0.0025(14) 
O1 0.0099(17) 0.0120(18) 0.0131(18) -0.0071(15) -0.0056(15) 0.0053(14) 
 
_geom_special_details 
; 
 All esds (except the esd in the dihedral angle between two l.s. planes) 
 are estimated using the full covariance matrix.  The cell esds are taken 
 into account individually in the estimation of esds in distances, angles 
 and torsion angles; correlations between esds in cell parameters are only 
 used when they are defined by crystal symmetry.  An approximate (isotropic) 
 treatment of cell esds is used for estimating esds involving l.s. planes. 
; 
 
loop_ 
 _geom_bond_atom_site_label_1 
 _geom_bond_atom_site_label_2 
 _geom_bond_distance 
 _geom_bond_site_symmetry_2 
 _geom_bond_publ_flag 
Ho1 O2 2.269(4) 1_655 ? 
Ho1 O6 2.301(4) 1_754 ? 
Ho1 O3 2.320(4) 2_765 ? 
Ho1 O3 2.331(4) . ? 
Ho1 O5 2.408(4) 2_656 ? 
Ho1 O7 2.430(4) 1_654 ? 
Ho1 O1 2.499(4) . ? 
Ho1 O5 2.521(4) 1_654 ? 
Ho1 S1 3.114(2) 1_654 ? 
Ho1 Cu1 3.391(2) 1_655 ? 
Ho1 Te1 3.3931(18) . ? 
Ho1 Ho1 3.797(3) 2_765 ? 
Te1 O2 1.874(4) . ? 
Te1 O3 1.880(4) . ? 
Te1 O1 1.906(4) . ? 
Te1 Cu1 3.1123(18) . ? 
Cu1 O1 1.951(4) 2_656 ? 
Cu1 O1 1.951(4) 1_455 ? 
Cu1 O2 2.053(4) . ? 
Cu1 O2 2.053(4) 2_556 ? 
Cu1 O4 2.259(4) 2_556 ? 
Cu1 O4 2.259(4) . ? 
Cu1 Te1 3.1123(18) 2_556 ? 
Cu1 Ho1 3.391(2) 2_656 ? 
Cu1 Ho1 3.391(2) 1_455 ? 
S1 O4 1.450(4) . ? 
S1 O6 1.483(4) . ? 
S1 O7 1.490(4) . ? 
S1 O5 1.506(4) . ? 
S1 Ho1 3.114(2) 1_456 ? 
O7 Ho1 2.430(4) 1_456 ? 
O6 Ho1 2.301(4) 1_356 ? 
O5 Ho1 2.408(4) 2_656 ? 
O5 Ho1 2.521(4) 1_456 ? 
O3 Ho1 2.320(4) 2_765 ? 
O2 Ho1 2.269(4) 1_455 ? 
O1 Cu1 1.951(4) 1_655 ? 
 
loop_ 
 _geom_angle_atom_site_label_1 
 _geom_angle_atom_site_label_2 
 _geom_angle_atom_site_label_3 
 _geom_angle 
 _geom_angle_site_symmetry_1 
 _geom_angle_site_symmetry_3 
 _geom_angle_publ_flag 
O2 Ho1 O6 97.92(16) 1_655 1_754 ? 
O2 Ho1 O3 84.36(14) 1_655 2_765 ? 
O6 Ho1 O3 76.36(15) 1_754 2_765 ? 
O2 Ho1 O3 94.72(15) 1_655 . ? 
O6 Ho1 O3 143.08(14) 1_754 . ? 
O3 Ho1 O3 70.55(16) 2_765 . ? 
O2 Ho1 O5 81.66(14) 1_655 2_656 ? 
O6 Ho1 O5 73.64(15) 1_754 2_656 ? 
O3 Ho1 O5 144.63(14) 2_765 2_656 ? 
O3 Ho1 O5 142.78(14) . 2_656 ? 
O2 Ho1 O7 162.55(15) 1_655 1_654 ? 
O6 Ho1 O7 85.26(16) 1_754 1_654 ? 
O3 Ho1 O7 79.71(14) 2_765 1_654 ? 
O3 Ho1 O7 73.32(15) . 1_654 ? 
O5 Ho1 O7 115.59(14) 2_656 1_654 ? 
O2 Ho1 O1 69.81(14) 1_655 . ? 
O6 Ho1 O1 151.27(14) 1_754 . ? 
O3 Ho1 O1 125.81(13) 2_765 . ? 
O3 Ho1 O1 65.41(13) . . ? 
O5 Ho1 O1 78.80(13) 2_656 . ? 
O7 Ho1 O1 114.42(15) 1_654 . ? 
O2 Ho1 O5 140.41(14) 1_655 1_654 ? 
O6 Ho1 O5 88.79(15) 1_754 1_654 ? 
O3 Ho1 O5 134.86(14) 2_765 1_654 ? 
O3 Ho1 O5 103.02(15) . 1_654 ? 
O5 Ho1 O5 62.83(17) 2_656 1_654 ? 
O7 Ho1 O5 56.46(14) 1_654 1_654 ? 
O1 Ho1 O5 85.78(14) . 1_654 ? 
O2 Ho1 S1 168.62(10) 1_655 1_654 ? 
O6 Ho1 S1 86.24(12) 1_754 1_654 ? 
O3 Ho1 S1 106.95(10) 2_765 1_654 ? 
O3 Ho1 S1 88.10(11) . 1_654 ? 
O5 Ho1 S1 89.42(10) 2_656 1_654 ? 
O7 Ho1 S1 27.86(10) 1_654 1_654 ? 
O1 Ho1 S1 101.62(11) . 1_654 ? 
O5 Ho1 S1 28.61(10) 1_654 1_654 ? 
O2 Ho1 Cu1 36.09(10) 1_655 1_655 ? 
O6 Ho1 Cu1 125.11(11) 1_754 1_655 ? 
O3 Ho1 Cu1 112.49(10) 2_765 1_655 ? 
O3 Ho1 Cu1 83.47(10) . 1_655 ? 
O5 Ho1 Cu1 71.88(10) 2_656 1_655 ? 
O7 Ho1 Cu1 148.60(11) 1_654 1_655 ? 
O1 Ho1 Cu1 34.66(9) . 1_655 ? 
O5 Ho1 Cu1 110.91(10) 1_654 1_655 ? 
S1 Ho1 Cu1 133.91(4) 1_654 1_655 ? 
O2 Ho1 Te1 83.76(12) 1_655 . ? 
O6 Ho1 Te1 175.09(11) 1_754 . ? 
O3 Ho1 Te1 99.28(10) 2_765 . ? 
O3 Ho1 Te1 32.01(9) . . ? 
O5 Ho1 Te1 111.21(10) 2_656 . ? 
O7 Ho1 Te1 91.78(12) 1_654 . ? 
O1 Ho1 Te1 33.59(9) . . ? 
O5 Ho1 Te1 92.84(11) 1_654 . ? 
S1 Ho1 Te1 92.97(7) 1_654 . ? 
Cu1 Ho1 Te1 58.47(4) 1_655 . ? 
O2 Ho1 Ho1 89.45(10) 1_655 2_765 ? 
O6 Ho1 Ho1 110.29(11) 1_754 2_765 ? 
O3 Ho1 Ho1 35.37(10) 2_765 2_765 ? 
O3 Ho1 Ho1 35.17(9) . 2_765 ? 
O5 Ho1 Ho1 170.78(10) 2_656 2_765 ? 
O7 Ho1 Ho1 73.42(10) 1_654 2_765 ? 
O1 Ho1 Ho1 95.85(9) . 2_765 ? 
O5 Ho1 Ho1 124.70(10) 1_654 2_765 ? 
S1 Ho1 Ho1 99.07(3) 1_654 2_765 ? 
Cu1 Ho1 Ho1 99.43(3) 1_655 2_765 ? 
Te1 Ho1 Ho1 65.035(12) . 2_765 ? 
O2 Te1 O3 100.50(18) . . ? 
O2 Te1 O1 91.86(18) . . ? 
O3 Te1 O1 87.34(18) . . ? 
O2 Te1 Cu1 39.62(13) . . ? 
O3 Te1 Cu1 140.12(12) . . ? 
O1 Te1 Cu1 92.74(13) . . ? 
O2 Te1 Ho1 94.91(14) . . ? 
O3 Te1 Ho1 41.10(12) . . ? 
O1 Te1 Ho1 46.52(12) . . ? 
Cu1 Te1 Ho1 122.83(4) . . ? 
O1 Cu1 O1 180.0 2_656 1_455 ? 
O1 Cu1 O2 93.85(17) 2_656 . ? 
O1 Cu1 O2 86.15(17) 1_455 . ? 
O1 Cu1 O2 86.15(17) 2_656 2_556 ? 
O1 Cu1 O2 93.85(17) 1_455 2_556 ? 
O2 Cu1 O2 180.0 . 2_556 ? 
O1 Cu1 O4 87.47(16) 2_656 2_556 ? 
O1 Cu1 O4 92.53(16) 1_455 2_556 ? 
O2 Cu1 O4 92.07(16) . 2_556 ? 
O2 Cu1 O4 87.93(16) 2_556 2_556 ? 
O1 Cu1 O4 92.53(16) 2_656 . ? 
O1 Cu1 O4 87.47(16) 1_455 . ? 
O2 Cu1 O4 87.93(16) . . ? 
O2 Cu1 O4 92.07(16) 2_556 . ? 
O4 Cu1 O4 179.999(1) 2_556 . ? 
O1 Cu1 Te1 62.57(12) 2_656 . ? 
O1 Cu1 Te1 117.43(12) 1_455 . ? 
O2 Cu1 Te1 35.60(11) . . ? 
O2 Cu1 Te1 144.40(11) 2_556 . ? 
O4 Cu1 Te1 106.01(12) 2_556 . ? 
O4 Cu1 Te1 73.99(12) . . ? 
O1 Cu1 Te1 117.43(12) 2_656 2_556 ? 
O1 Cu1 Te1 62.57(12) 1_455 2_556 ? 
O2 Cu1 Te1 144.40(11) . 2_556 ? 
O2 Cu1 Te1 35.60(11) 2_556 2_556 ? 
O4 Cu1 Te1 73.99(12) 2_556 2_556 ? 
O4 Cu1 Te1 106.01(12) . 2_556 ? 
Te1 Cu1 Te1 180.0 . 2_556 ? 
O1 Cu1 Ho1 46.78(12) 2_656 2_656 ? 
O1 Cu1 Ho1 133.22(12) 1_455 2_656 ? 
O2 Cu1 Ho1 139.38(11) . 2_656 ? 
O2 Cu1 Ho1 40.62(11) 2_556 2_656 ? 
O4 Cu1 Ho1 95.09(11) 2_556 2_656 ? 
O4 Cu1 Ho1 84.91(11) . 2_656 ? 
Te1 Cu1 Ho1 104.519(18) . 2_656 ? 
Te1 Cu1 Ho1 75.481(19) 2_556 2_656 ? 
O1 Cu1 Ho1 133.22(12) 2_656 1_455 ? 
O1 Cu1 Ho1 46.78(12) 1_455 1_455 ? 
O2 Cu1 Ho1 40.62(11) . 1_455 ? 
O2 Cu1 Ho1 139.38(11) 2_556 1_455 ? 
O4 Cu1 Ho1 84.91(11) 2_556 1_455 ? 
O4 Cu1 Ho1 95.09(11) . 1_455 ? 
Te1 Cu1 Ho1 75.481(18) . 1_455 ? 
Te1 Cu1 Ho1 104.519(18) 2_556 1_455 ? 
Ho1 Cu1 Ho1 180.0 2_656 1_455 ? 
O4 S1 O6 109.5(3) . . ? 
O4 S1 O7 112.3(3) . . ? 
O6 S1 O7 109.6(3) . . ? 
O4 S1 O5 111.5(3) . . ? 
O6 S1 O5 110.9(3) . . ? 
O7 S1 O5 102.9(2) . . ? 
O4 S1 Ho1 125.86(19) . 1_456 ? 
O6 S1 Ho1 124.60(18) . 1_456 ? 
O7 S1 Ho1 49.64(17) . 1_456 ? 
O5 S1 Ho1 53.26(17) . 1_456 ? 
S1 O7 Ho1 102.5(2) . 1_456 ? 
S1 O4 Cu1 129.1(3) . . ? 
S1 O6 Ho1 141.2(3) . 1_356 ? 
S1 O5 Ho1 138.0(2) . 2_656 ? 
S1 O5 Ho1 98.1(2) . 1_456 ? 
Ho1 O5 Ho1 117.17(17) 2_656 1_456 ? 
Te1 O3 Ho1 134.8(2) . 2_765 ? 
Te1 O3 Ho1 106.88(17) . . ? 
Ho1 O3 Ho1 109.46(16) 2_765 . ? 
Te1 O2 Cu1 104.78(19) . . ? 
Te1 O2 Ho1 148.3(2) . 1_455 ? 
Cu1 O2 Ho1 103.29(17) . 1_455 ? 
Te1 O1 Cu1 118.5(2) . 1_655 ? 
Te1 O1 Ho1 99.88(16) . . ? 
Cu1 O1 Ho1 98.55(16) 1_655 . ? 
 
_diffrn_measured_fraction_theta_max    0.980 
_diffrn_reflns_theta_full              27.47 
_diffrn_measured_fraction_theta_full   0.980 
_refine_diff_density_max    3.458 
_refine_diff_density_min   -1.510 
_refine_diff_density_rms    0.235 

#=============================================================END
 
data_Ho2CuTe2S2O14_100K 
 
_audit_creation_method            SHELXL-97 
_chemical_name_systematic 
; 
 ? 
; 
_chemical_name_common             'Holmium copper tellurite sulfate' 
_chemical_melting_point           'N//A' 
_chemical_formula_moiety          Ho2Cu(TeO3)2(SO4)2  
_chemical_formula_sum 
 'Cu Ho2 O14 S2 Te2' 
_chemical_formula_weight          936.72 
 
loop_ 
 _atom_type_symbol 
 _atom_type_description 
 _atom_type_scat_dispersion_real 
 _atom_type_scat_dispersion_imag 
 _atom_type_scat_source 
 'O'  'O'   0.0106   0.0060 
 'International Tables Vol C Tables 4.2.6.8 and 6.1.1.4' 
 'S'  'S'   0.1246   0.1234 
 'International Tables Vol C Tables 4.2.6.8 and 6.1.1.4' 
 'Cu'  'Cu'   0.3201   1.2651 
 'International Tables Vol C Tables 4.2.6.8 and 6.1.1.4' 
 'Te'  'Te'  -0.5308   1.6751 
 'International Tables Vol C Tables 4.2.6.8 and 6.1.1.4' 
 'Ho'  'Ho'  -0.2175   4.6783 
 'International Tables Vol C Tables 4.2.6.8 and 6.1.1.4' 
 
_symmetry_cell_setting            'triclinic' 
_symmetry_space_group_name_H-M    'P-1'
 
loop_ 
 _symmetry_equiv_pos_as_xyz 
 'x, y, z' 
 '-x, -y, -z' 
 
_cell_length_a                    5.1602(16) 
_cell_length_b                    7.799(2) 
_cell_length_c                    8.095(3) 
_cell_angle_alpha                 62.604(2) 
_cell_angle_beta                  73.937(3) 
_cell_angle_gamma                 85.210(3) 
_cell_volume                      277.58(15) 
_cell_formula_units_Z             1 
_cell_measurement_temperature     100(2) 
_cell_measurement_reflns_used     1266 
_cell_measurement_theta_min       2.94
_cell_measurement_theta_max       27.470 
 
_exptl_crystal_description        'block' 
_exptl_crystal_colour             'light green' 
_exptl_crystal_size_max           0.100 
_exptl_crystal_size_mid           0.080 
_exptl_crystal_size_min           0.020 
_exptl_crystal_density_meas       'N/A'  
_exptl_crystal_density_diffrn     5.604 
_exptl_crystal_density_method     'not measured' 
_exptl_crystal_F_000              411 
_exptl_absorpt_coefficient_mu     21.622 
_exptl_absorpt_correction_type    'numerical'
_exptl_absorpt_correction_T_min   0.137 
_exptl_absorpt_correction_T_max   0.649 
_exptl_absorpt_process_details    'SHELTXPREP'
 
_exptl_special_details 
; 
 ? 
; 
 
_diffrn_ambient_temperature       100(2) 
_diffrn_radiation_wavelength      0.71073 
_diffrn_radiation_type            MoK\a 
_diffrn_radiation_source          'Imus microfocused' 
_diffrn_radiation_monochromator   'Quazar optics' 
_diffrn_measurement_device_type   'BRUKER apex II'
_diffrn_measurement_method        '0.5 wide w/ exposures'
_diffrn_detector_area_resol_mean  0  
_diffrn_reflns_number             3320 
_diffrn_reflns_av_R_equivalents   0.0235 
_diffrn_reflns_av_sigmaI/netI     0.0262 
_diffrn_reflns_limit_h_min        -6 
_diffrn_reflns_limit_h_max        6 
_diffrn_reflns_limit_k_min        -10 
_diffrn_reflns_limit_k_max        10 
_diffrn_reflns_limit_l_min        -10 
_diffrn_reflns_limit_l_max        10 
_diffrn_reflns_theta_min          2.94 
_diffrn_reflns_theta_max          27.47 
_reflns_number_total              1266 
_reflns_number_gt                 1226 
_reflns_threshold_expression      >2sigma(I) 
 
_computing_data_collection        'smart' 
_computing_cell_refinement        'smart saint'
_computing_data_reduction         'SAINT'
_computing_structure_solution     'SHELXS-97 (Sheldrick, 1990)' 
_computing_structure_refinement   'SHELXL-97 (Sheldrick, 1997)' 
_computing_molecular_graphics     'SHELXP-97 (Sheldrick, 1997)' 
_computing_publication_material   'SHELXCIF-97 (Sheldrick, 2000)'
 
_refine_special_details 
; 
 Refinement of F^2^ against ALL reflections.  The weighted R-factor wR and 
 goodness of fit S are based on F^2^, conventional R-factors R are based 
 on F, with F set to zero for negative F^2^. The threshold expression of 
 F^2^ > 2sigma(F^2^) is used only for calculating R-factors(gt) etc. and is 
 not relevant to the choice of reflections for refinement.  R-factors based 
 on F^2^ are statistically about twice as large as those based on F, and R- 
 factors based on ALL data will be even larger. 
; 
 
_refine_ls_structure_factor_coef  Fsqd  
_refine_ls_matrix_type            full 
_refine_ls_weighting_scheme       calc  
_refine_ls_weighting_details 
 'calc w=1/[\s^2^(Fo^2^)+(0.0212P)^2^+2.0379P] where P=(Fo^2^+2Fc^2^)/3' 
_atom_sites_solution_primary      direct 
_atom_sites_solution_secondary    difmap 
_atom_sites_solution_hydrogens    none 
_refine_ls_hydrogen_treatment     none 
_refine_ls_extinction_method      none 
_refine_ls_extinction_coef        ? 
_refine_ls_number_reflns          1266 
_refine_ls_number_parameters      97 
_refine_ls_number_restraints      0 
_refine_ls_R_factor_all           0.0208 
_refine_ls_R_factor_gt            0.0201 
_refine_ls_wR_factor_ref          0.0497 
_refine_ls_wR_factor_gt           0.0494 
_refine_ls_goodness_of_fit_ref    1.079 
_refine_ls_restrained_S_all       1.079 
_refine_ls_shift/su_max           0.000 
_refine_ls_shift/su_mean          0.000 
 
loop_ 
 _atom_site_label 
 _atom_site_type_symbol 
 _atom_site_fract_x 
 _atom_site_fract_y 
 _atom_site_fract_z 
 _atom_site_U_iso_or_equiv 
 _atom_site_adp_type 
 _atom_site_occupancy 
 _atom_site_symmetry_multiplicity 
 _atom_site_calc_flag 
 _atom_site_refinement_flags 
 _atom_site_disorder_assembly 
 _atom_site_disorder_group 
Ho1 Ho 1.06926(5) 0.25031(3) 0.01908(3) 0.00423(9) Uani 1 1 d . . . 
Te1 Te 0.50851(7) 0.27158(5) 0.34512(5) 0.00519(10) Uani 1 1 d . . . 
Cu1 Cu 0.0000 0.0000 0.5000 0.00637(19) Uani 1 2 d S . . 
S1 S -0.2542(3) 0.25352(18) 0.74669(18) 0.0060(3) Uani 1 1 d . . . 
O7 O -0.1439(8) 0.4170(6) 0.7574(5) 0.0089(8) Uani 1 1 d . . . 
O4 O -0.1368(8) 0.2536(6) 0.5620(5) 0.0082(8) Uani 1 1 d . . . 
O6 O -0.5507(8) 0.2623(6) 0.7828(5) 0.0084(8) Uani 1 1 d . . . 
O5 O -0.1782(8) 0.0782(5) 0.9072(5) 0.0073(7) Uani 1 1 d . . . 
O3 O 0.7447(8) 0.4393(5) 0.1105(5) 0.0057(7) Uani 1 1 d . . . 
O2 O 0.2710(8) 0.1873(5) 0.2558(5) 0.0065(7) Uani 1 1 d . . . 
O1 O 0.7474(8) 0.0721(5) 0.3418(5) 0.0063(7) Uani 1 1 d . . . 
 
loop_ 
 _atom_site_aniso_label 
 _atom_site_aniso_U_11 
 _atom_site_aniso_U_22 
 _atom_site_aniso_U_33 
 _atom_site_aniso_U_23 
 _atom_site_aniso_U_13 
 _atom_site_aniso_U_12 
Ho1 0.00439(13) 0.00385(13) 0.00556(13) -0.00318(10) -0.00129(9) 0.00081(9) 
Te1 0.00439(17) 0.00559(18) 0.00644(17) -0.00367(14) -0.00121(12) 0.00074(12) 
Cu1 0.0061(4) 0.0068(4) 0.0064(4) -0.0030(4) -0.0019(3) 0.0006(3) 
S1 0.0045(6) 0.0048(6) 0.0070(6) -0.0010(5) -0.0021(5) 0.0008(5) 
O7 0.013(2) 0.0078(19) 0.0088(18) -0.0044(16) -0.0052(15) -0.0011(15) 
O4 0.0095(19) 0.0086(19) 0.0079(18) -0.0049(16) -0.0029(15) 0.0023(15) 
O6 0.0050(18) 0.0109(19) 0.0094(18) -0.0061(16) 0.0006(14) 0.0009(14) 
O5 0.0112(19) 0.0037(17) 0.0070(18) -0.0020(15) -0.0042(14) 0.0036(14) 
O3 0.0062(18) 0.0013(17) 0.0085(18) -0.0018(14) -0.0012(14) 0.0007(13) 
O2 0.0073(18) 0.0063(18) 0.0080(18) -0.0041(15) -0.0030(14) -0.0018(14) 
O1 0.0069(18) 0.0069(18) 0.0069(18) -0.0045(15) -0.0027(14) 0.0029(14) 
 
_geom_special_details 
; 
 All esds (except the esd in the dihedral angle between two l.s. planes) 
 are estimated using the full covariance matrix.  The cell esds are taken 
 into account individually in the estimation of esds in distances, angles 
 and torsion angles; correlations between esds in cell parameters are only 
 used when they are defined by crystal symmetry.  An approximate (isotropic) 
 treatment of cell esds is used for estimating esds involving l.s. planes. 
; 
 
loop_ 
 _geom_bond_atom_site_label_1 
 _geom_bond_atom_site_label_2 
 _geom_bond_distance 
 _geom_bond_site_symmetry_2 
 _geom_bond_publ_flag 
Ho1 O2 2.269(4) 1_655 ? 
Ho1 O6 2.303(4) 1_754 ? 
Ho1 O3 2.318(4) 2_765 ? 
Ho1 O3 2.330(4) . ? 
Ho1 O5 2.403(4) 2_656 ? 
Ho1 O7 2.430(4) 1_654 ? 
Ho1 O1 2.482(4) . ? 
Ho1 O5 2.510(4) 1_654 ? 
Ho1 S1 3.1027(15) 1_654 ? 
Ho1 Cu1 3.3833(13) 1_655 ? 
Ho1 Te1 3.3857(9) . ? 
Ho1 Ho1 3.7849(11) 2_765 ? 
Te1 O3 1.872(4) . ? 
Te1 O2 1.876(4) . ? 
Te1 O1 1.908(4) . ? 
Te1 Cu1 3.0995(8) . ? 
Cu1 O1 1.947(4) 2_656 ? 
Cu1 O1 1.947(4) 1_455 ? 
Cu1 O2 2.037(4) . ? 
Cu1 O2 2.037(4) 2_556 ? 
Cu1 O4 2.268(4) . ? 
Cu1 O4 2.268(4) 2_556 ? 
Cu1 Te1 3.0995(8) 2_556 ? 
Cu1 Ho1 3.3833(13) 1_455 ? 
Cu1 Ho1 3.3833(13) 2_656 ? 
S1 O4 1.450(4) . ? 
S1 O6 1.478(4) . ? 
S1 O7 1.486(4) . ? 
S1 O5 1.506(4) . ? 
S1 Ho1 3.1028(15) 1_456 ? 
O7 Ho1 2.430(4) 1_456 ? 
O6 Ho1 2.303(4) 1_356 ? 
O5 Ho1 2.403(4) 2_656 ? 
O5 Ho1 2.510(4) 1_456 ? 
O3 Ho1 2.318(4) 2_765 ? 
O2 Ho1 2.269(4) 1_455 ? 
O1 Cu1 1.947(4) 1_655 ? 
 
loop_ 
 _geom_angle_atom_site_label_1 
 _geom_angle_atom_site_label_2 
 _geom_angle_atom_site_label_3 
 _geom_angle 
 _geom_angle_site_symmetry_1 
 _geom_angle_site_symmetry_3 
 _geom_angle_publ_flag 
O2 Ho1 O6 98.12(14) 1_655 1_754 ? 
O2 Ho1 O3 84.01(13) 1_655 2_765 ? 
O6 Ho1 O3 76.27(13) 1_754 2_765 ? 
O2 Ho1 O3 94.27(13) 1_655 . ? 
O6 Ho1 O3 143.44(13) 1_754 . ? 
O3 Ho1 O3 70.99(15) 2_765 . ? 
O2 Ho1 O5 81.37(13) 1_655 2_656 ? 
O6 Ho1 O5 73.06(14) 1_754 2_656 ? 
O3 Ho1 O5 143.58(13) 2_765 2_656 ? 
O3 Ho1 O5 143.10(13) . 2_656 ? 
O2 Ho1 O7 162.32(13) 1_655 1_654 ? 
O6 Ho1 O7 85.72(14) 1_754 1_654 ? 
O3 Ho1 O7 80.13(13) 2_765 1_654 ? 
O3 Ho1 O7 73.21(13) . 1_654 ? 
O5 Ho1 O7 116.17(13) 2_656 1_654 ? 
O2 Ho1 O1 69.58(13) 1_655 . ? 
O6 Ho1 O1 150.88(13) 1_754 . ? 
O3 Ho1 O1 126.09(12) 2_765 . ? 
O3 Ho1 O1 65.44(13) . . ? 
O5 Ho1 O1 78.91(12) 2_656 . ? 
O7 Ho1 O1 114.20(13) 1_654 . ? 
O2 Ho1 O5 140.38(13) 1_655 1_654 ? 
O6 Ho1 O5 88.03(13) 1_754 1_654 ? 
O3 Ho1 O5 135.10(13) 2_765 1_654 ? 
O3 Ho1 O5 103.78(13) . 1_654 ? 
O5 Ho1 O5 63.01(15) 2_656 1_654 ? 
O7 Ho1 O5 56.63(12) 1_654 1_654 ? 
O1 Ho1 O5 86.20(12) . 1_654 ? 
O2 Ho1 S1 168.69(10) 1_655 1_654 ? 
O6 Ho1 S1 85.93(10) 1_754 1_654 ? 
O3 Ho1 S1 107.25(10) 2_765 1_654 ? 
O3 Ho1 S1 88.54(10) . 1_654 ? 
O5 Ho1 S1 89.80(9) 2_656 1_654 ? 
O7 Ho1 S1 27.92(9) 1_654 1_654 ? 
O1 Ho1 S1 101.89(9) . 1_654 ? 
O5 Ho1 S1 28.73(9) 1_654 1_654 ? 
O2 Ho1 Cu1 35.85(10) 1_655 1_655 ? 
O6 Ho1 Cu1 124.96(10) 1_754 1_655 ? 
O3 Ho1 Cu1 112.21(9) 2_765 1_655 ? 
O3 Ho1 Cu1 83.23(9) . 1_655 ? 
O5 Ho1 Cu1 71.86(9) 2_656 1_655 ? 
O7 Ho1 Cu1 148.31(10) 1_654 1_655 ? 
O1 Ho1 Cu1 34.66(9) . 1_655 ? 
O5 Ho1 Cu1 111.26(9) 1_654 1_655 ? 
S1 Ho1 Cu1 134.21(3) 1_654 1_655 ? 
O2 Ho1 Te1 83.47(10) 1_655 . ? 
O6 Ho1 Te1 175.38(10) 1_754 . ? 
O3 Ho1 Te1 99.65(9) 2_765 . ? 
O3 Ho1 Te1 31.94(9) . . ? 
O5 Ho1 Te1 111.51(9) 2_656 . ? 
O7 Ho1 Te1 91.48(10) 1_654 . ? 
O1 Ho1 Te1 33.70(9) . . ? 
O5 Ho1 Te1 93.50(9) 1_654 . ? 
S1 Ho1 Te1 93.31(4) 1_654 . ? 
Cu1 Ho1 Te1 58.411(18) 1_655 . ? 
O2 Ho1 Ho1 88.97(10) 1_655 2_765 ? 
O6 Ho1 Ho1 110.44(10) 1_754 2_765 ? 
O3 Ho1 Ho1 35.60(9) 2_765 2_765 ? 
O3 Ho1 Ho1 35.39(9) . 2_765 ? 
O5 Ho1 Ho1 170.16(9) 2_656 2_765 ? 
O7 Ho1 Ho1 73.57(9) 1_654 2_765 ? 
O1 Ho1 Ho1 96.02(9) . 2_765 ? 
O5 Ho1 Ho1 125.49(9) 1_654 2_765 ? 
S1 Ho1 Ho1 99.55(3) 1_654 2_765 ? 
Cu1 Ho1 Ho1 99.145(15) 1_655 2_765 ? 
Te1 Ho1 Ho1 65.176(9) . 2_765 ? 
O3 Te1 O2 100.55(17) . . ? 
O3 Te1 O1 87.09(16) . . ? 
O2 Te1 O1 91.45(17) . . ? 
O3 Te1 Cu1 140.02(11) . . ? 
O2 Te1 Cu1 39.48(12) . . ? 
O1 Te1 Cu1 92.67(12) . . ? 
O3 Te1 Ho1 41.20(11) . . ? 
O2 Te1 Ho1 94.54(12) . . ? 
O1 Te1 Ho1 46.18(11) . . ? 
Cu1 Te1 Ho1 122.442(18) . . ? 
O1 Cu1 O1 180.0 2_656 1_455 ? 
O1 Cu1 O2 94.07(16) 2_656 . ? 
O1 Cu1 O2 85.93(16) 1_455 . ? 
O1 Cu1 O2 85.93(16) 2_656 2_556 ? 
O1 Cu1 O2 94.07(16) 1_455 2_556 ? 
O2 Cu1 O2 180.0 . 2_556 ? 
O1 Cu1 O4 92.28(14) 2_656 . ? 
O1 Cu1 O4 87.72(14) 1_455 . ? 
O2 Cu1 O4 87.84(14) . . ? 
O2 Cu1 O4 92.16(14) 2_556 . ? 
O1 Cu1 O4 87.72(14) 2_656 2_556 ? 
O1 Cu1 O4 92.28(14) 1_455 2_556 ? 
O2 Cu1 O4 92.16(14) . 2_556 ? 
O2 Cu1 O4 87.84(14) 2_556 2_556 ? 
O4 Cu1 O4 180.0 . 2_556 ? 
O1 Cu1 Te1 117.43(11) 2_656 2_556 ? 
O1 Cu1 Te1 62.57(11) 1_455 2_556 ? 
O2 Cu1 Te1 144.17(10) . 2_556 ? 
O2 Cu1 Te1 35.83(10) 2_556 2_556 ? 
O4 Cu1 Te1 106.30(10) . 2_556 ? 
O4 Cu1 Te1 73.70(10) 2_556 2_556 ? 
O1 Cu1 Te1 62.57(11) 2_656 . ? 
O1 Cu1 Te1 117.43(11) 1_455 . ? 
O2 Cu1 Te1 35.83(10) . . ? 
O2 Cu1 Te1 144.17(10) 2_556 . ? 
O4 Cu1 Te1 73.70(10) . . ? 
O4 Cu1 Te1 106.30(10) 2_556 . ? 
Te1 Cu1 Te1 180.0 2_556 . ? 
O1 Cu1 Ho1 133.56(11) 2_656 1_455 ? 
O1 Cu1 Ho1 46.44(11) 1_455 1_455 ? 
O2 Cu1 Ho1 40.72(10) . 1_455 ? 
O2 Cu1 Ho1 139.28(10) 2_556 1_455 ? 
O4 Cu1 Ho1 95.10(10) . 1_455 ? 
O4 Cu1 Ho1 84.90(10) 2_556 1_455 ? 
Te1 Cu1 Ho1 104.207(10) 2_556 1_455 ? 
Te1 Cu1 Ho1 75.793(10) . 1_455 ? 
O1 Cu1 Ho1 46.44(11) 2_656 2_656 ? 
O1 Cu1 Ho1 133.56(11) 1_455 2_656 ? 
O2 Cu1 Ho1 139.28(10) . 2_656 ? 
O2 Cu1 Ho1 40.72(10) 2_556 2_656 ? 
O4 Cu1 Ho1 84.90(10) . 2_656 ? 
O4 Cu1 Ho1 95.10(10) 2_556 2_656 ? 
Te1 Cu1 Ho1 75.793(10) 2_556 2_656 ? 
Te1 Cu1 Ho1 104.207(10) . 2_656 ? 
Ho1 Cu1 Ho1 180.0 1_455 2_656 ? 
O4 S1 O6 109.8(2) . . ? 
O4 S1 O7 112.3(2) . . ? 
O6 S1 O7 109.5(2) . . ? 
O4 S1 O5 110.9(2) . . ? 
O6 S1 O5 111.0(2) . . ? 
O7 S1 O5 103.2(2) . . ? 
O4 S1 Ho1 125.18(17) . 1_456 ? 
O6 S1 Ho1 124.99(16) . 1_456 ? 
O7 S1 Ho1 49.96(15) . 1_456 ? 
O5 S1 Ho1 53.22(15) . 1_456 ? 
S1 O7 Ho1 102.1(2) . 1_456 ? 
S1 O4 Cu1 128.8(2) . . ? 
S1 O6 Ho1 140.7(2) . 1_356 ? 
S1 O5 Ho1 138.5(2) . 2_656 ? 
S1 O5 Ho1 98.05(18) . 1_456 ? 
Ho1 O5 Ho1 116.99(15) 2_656 1_456 ? 
Te1 O3 Ho1 135.13(19) . 2_765 ? 
Te1 O3 Ho1 106.85(16) . . ? 
Ho1 O3 Ho1 109.01(15) 2_765 . ? 
Te1 O2 Cu1 104.69(17) . . ? 
Te1 O2 Ho1 148.2(2) . 1_455 ? 
Cu1 O2 Ho1 103.42(16) . 1_455 ? 
Te1 O1 Cu1 117.89(18) . 1_655 ? 
Te1 O1 Ho1 100.12(15) . . ? 
Cu1 O1 Ho1 98.91(15) 1_655 . ? 
 
loop_ 
 _geom_torsion_atom_site_label_1 
 _geom_torsion_atom_site_label_2 
 _geom_torsion_atom_site_label_3 
 _geom_torsion_atom_site_label_4 
 _geom_torsion 
 _geom_torsion_site_symmetry_1 
 _geom_torsion_site_symmetry_2 
 _geom_torsion_site_symmetry_3 
 _geom_torsion_site_symmetry_4 
 _geom_torsion_publ_flag 
O2 Ho1 Te1 O3 109.0(2) 1_655 . . . ? 
O6 Ho1 Te1 O3 -1.5(12) 1_754 . . . ? 
O3 Ho1 Te1 O3 26.2(3) 2_765 . . . ? 
O5 Ho1 Te1 O3 -173.0(2) 2_656 . . . ? 
O7 Ho1 Te1 O3 -54.0(2) 1_654 . . . ? 
O1 Ho1 Te1 O3 171.5(2) . . . . ? 
O5 Ho1 Te1 O3 -110.68(19) 1_654 . . . ? 
S1 Ho1 Te1 O3 -81.90(17) 1_654 . . . ? 
Cu1 Ho1 Te1 O3 136.44(17) 1_655 . . . ? 
Ho1 Ho1 Te1 O3 17.10(17) 2_765 . . . ? 
O2 Ho1 Te1 O2 -150.2(2) 1_655 . . . ? 
O6 Ho1 Te1 O2 99.3(12) 1_754 . . . ? 
O3 Ho1 Te1 O2 127.06(15) 2_765 . . . ? 
O3 Ho1 Te1 O2 100.8(2) . . . . ? 
O5 Ho1 Te1 O2 -72.15(15) 2_656 . . . ? 
O7 Ho1 Te1 O2 46.82(14) 1_654 . . . ? 
O1 Ho1 Te1 O2 -87.64(19) . . . . ? 
O5 Ho1 Te1 O2 -9.84(14) 1_654 . . . ? 
S1 Ho1 Te1 O2 18.94(12) 1_654 . . . ? 
Cu1 Ho1 Te1 O2 -122.72(12) 1_655 . . . ? 
Ho1 Ho1 Te1 O2 117.94(12) 2_765 . . . ? 
O2 Ho1 Te1 O1 -62.53(18) 1_655 . . . ? 
O6 Ho1 Te1 O1 -173.0(12) 1_754 . . . ? 
O3 Ho1 Te1 O1 -145.29(18) 2_765 . . . ? 
O3 Ho1 Te1 O1 -171.5(2) . . . . ? 
O5 Ho1 Te1 O1 15.50(18) 2_656 . . . ? 
O7 Ho1 Te1 O1 134.47(18) 1_654 . . . ? 
O5 Ho1 Te1 O1 77.81(18) 1_654 . . . ? 
S1 Ho1 Te1 O1 106.58(16) 1_654 . . . ? 
Cu1 Ho1 Te1 O1 -35.07(15) 1_655 . . . ? 
Ho1 Ho1 Te1 O1 -154.42(15) 2_765 . . . ? 
O2 Ho1 Te1 Cu1 -120.29(10) 1_655 . . . ? 
O6 Ho1 Te1 Cu1 129.2(12) 1_754 . . . ? 
O3 Ho1 Te1 Cu1 156.95(9) 2_765 . . . ? 
O3 Ho1 Te1 Cu1 130.73(17) . . . . ? 
O5 Ho1 Te1 Cu1 -42.26(10) 2_656 . . . ? 
O7 Ho1 Te1 Cu1 76.70(9) 1_654 . . . ? 
O1 Ho1 Te1 Cu1 -57.76(15) . . . . ? 
O5 Ho1 Te1 Cu1 20.05(9) 1_654 . . . ? 
S1 Ho1 Te1 Cu1 48.82(3) 1_654 . . . ? 
Cu1 Ho1 Te1 Cu1 -92.84(2) 1_655 . . . ? 
Ho1 Ho1 Te1 Cu1 147.821(17) 2_765 . . . ? 
O3 Te1 Cu1 O1 148.4(2) . . . 2_656 ? 
O2 Te1 Cu1 O1 148.8(2) . . . 2_656 ? 
O1 Te1 Cu1 O1 59.8(2) . . . 2_656 ? 
Ho1 Te1 Cu1 O1 97.44(12) . . . 2_656 ? 
O3 Te1 Cu1 O1 -31.6(2) . . . 1_455 ? 
O2 Te1 Cu1 O1 -31.2(2) . . . 1_455 ? 
O1 Te1 Cu1 O1 -120.2(2) . . . 1_455 ? 
Ho1 Te1 Cu1 O1 -82.56(12) . . . 1_455 ? 
O3 Te1 Cu1 O2 -0.4(2) . . . . ? 
O1 Te1 Cu1 O2 -89.0(2) . . . . ? 
Ho1 Te1 Cu1 O2 -51.37(18) . . . . ? 
O3 Te1 Cu1 O2 179.6(2) . . . 2_556 ? 
O2 Te1 Cu1 O2 180.0 . . . 2_556 ? 
O1 Te1 Cu1 O2 91.0(2) . . . 2_556 ? 
Ho1 Te1 Cu1 O2 128.63(18) . . . 2_556 ? 
O3 Te1 Cu1 O4 -110.1(2) . . . . ? 
O2 Te1 Cu1 O4 -109.7(2) . . . . ? 
O1 Te1 Cu1 O4 161.22(15) . . . . ? 
Ho1 Te1 Cu1 O4 -161.12(10) . . . . ? 
O3 Te1 Cu1 O4 69.9(2) . . . 2_556 ? 
O2 Te1 Cu1 O4 70.3(2) . . . 2_556 ? 
O1 Te1 Cu1 O4 -18.78(15) . . . 2_556 ? 
Ho1 Te1 Cu1 O4 18.88(10) . . . 2_556 ? 
O3 Te1 Cu1 Te1 -133(21) . . . 2_556 ? 
O2 Te1 Cu1 Te1 -133(21) . . . 2_556 ? 
O1 Te1 Cu1 Te1 138(21) . . . 2_556 ? 
Ho1 Te1 Cu1 Te1 176(21) . . . 2_556 ? 
O3 Te1 Cu1 Ho1 -10.37(17) . . . 1_455 ? 
O2 Te1 Cu1 Ho1 -9.98(18) . . . 1_455 ? 
O1 Te1 Cu1 Ho1 -99.02(11) . . . 1_455 ? 
Ho1 Te1 Cu1 Ho1 -61.36(2) . . . 1_455 ? 
O3 Te1 Cu1 Ho1 169.63(17) . . . 2_656 ? 
O2 Te1 Cu1 Ho1 170.02(18) . . . 2_656 ? 
O1 Te1 Cu1 Ho1 80.98(11) . . . 2_656 ? 
Ho1 Te1 Cu1 Ho1 118.64(2) . . . 2_656 ? 
O4 S1 O7 Ho1 -117.9(2) . . . 1_456 ? 
O6 S1 O7 Ho1 119.8(2) . . . 1_456 ? 
O5 S1 O7 Ho1 1.5(2) . . . 1_456 ? 
O6 S1 O4 Cu1 -99.5(3) . . . . ? 
O7 S1 O4 Cu1 138.4(3) . . . . ? 
O5 S1 O4 Cu1 23.5(4) . . . . ? 
Ho1 S1 O4 Cu1 82.5(3) 1_456 . . . ? 
O1 Cu1 O4 S1 -58.1(3) 2_656 . . . ? 
O1 Cu1 O4 S1 121.9(3) 1_455 . . . ? 
O2 Cu1 O4 S1 -152.1(3) . . . . ? 
O2 Cu1 O4 S1 27.9(3) 2_556 . . . ? 
O4 Cu1 O4 S1 43(7) 2_556 . . . ? 
Te1 Cu1 O4 S1 61.4(3) 2_556 . . . ? 
Te1 Cu1 O4 S1 -118.6(3) . . . . ? 
Ho1 Cu1 O4 S1 167.8(3) 1_455 . . . ? 
Ho1 Cu1 O4 S1 -12.2(3) 2_656 . . . ? 
O4 S1 O6 Ho1 174.7(3) . . . 1_356 ? 
O7 S1 O6 Ho1 -61.5(4) . . . 1_356 ? 
O5 S1 O6 Ho1 51.7(4) . . . 1_356 ? 
Ho1 S1 O6 Ho1 -7.3(5) 1_456 . . 1_356 ? 
O4 S1 O5 Ho1 -29.4(4) . . . 2_656 ? 
O6 S1 O5 Ho1 92.9(4) . . . 2_656 ? 
O7 S1 O5 Ho1 -149.9(3) . . . 2_656 ? 
Ho1 S1 O5 Ho1 -148.4(4) 1_456 . . 2_656 ? 
O4 S1 O5 Ho1 119.0(2) . . . 1_456 ? 
O6 S1 O5 Ho1 -118.7(2) . . . 1_456 ? 
O7 S1 O5 Ho1 -1.5(2) . . . 1_456 ? 
O2 Te1 O3 Ho1 133.3(3) . . . 2_765 ? 
O1 Te1 O3 Ho1 -135.8(3) . . . 2_765 ? 
Cu1 Te1 O3 Ho1 133.56(18) . . . 2_765 ? 
Ho1 Te1 O3 Ho1 -141.9(4) . . . 2_765 ? 
O2 Te1 O3 Ho1 -84.81(18) . . . . ? 
O1 Te1 O3 Ho1 6.12(16) . . . . ? 
Cu1 Te1 O3 Ho1 -84.6(2) . . . . ? 
O2 Ho1 O3 Te1 -70.41(18) 1_655 . . . ? 
O6 Ho1 O3 Te1 179.80(16) 1_754 . . . ? 
O3 Ho1 O3 Te1 -152.6(3) 2_765 . . . ? 
O5 Ho1 O3 Te1 10.9(3) 2_656 . . . ? 
O7 Ho1 O3 Te1 122.33(19) 1_654 . . . ? 
O1 Ho1 O3 Te1 -5.17(14) . . . . ? 
O5 Ho1 O3 Te1 74.05(18) 1_654 . . . ? 
S1 Ho1 O3 Te1 98.62(15) 1_654 . . . ? 
Cu1 Ho1 O3 Te1 -36.24(14) 1_655 . . . ? 
Ho1 Ho1 O3 Te1 -152.6(3) 2_765 . . . ? 
O2 Ho1 O3 Ho1 82.16(16) 1_655 . . 2_765 ? 
O6 Ho1 O3 Ho1 -27.6(3) 1_754 . . 2_765 ? 
O3 Ho1 O3 Ho1 0.0 2_765 . . 2_765 ? 
O5 Ho1 O3 Ho1 163.47(15) 2_656 . . 2_765 ? 
O7 Ho1 O3 Ho1 -85.10(16) 1_654 . . 2_765 ? 
O1 Ho1 O3 Ho1 147.40(19) . . . 2_765 ? 
O5 Ho1 O3 Ho1 -133.38(14) 1_654 . . 2_765 ? 
S1 Ho1 O3 Ho1 -108.81(13) 1_654 . . 2_765 ? 
Cu1 Ho1 O3 Ho1 116.33(13) 1_655 . . 2_765 ? 
Te1 Ho1 O3 Ho1 152.6(3) . . . 2_765 ? 
O3 Te1 O2 Cu1 179.75(16) . . . . ? 
O1 Te1 O2 Cu1 92.44(18) . . . . ? 
Ho1 Te1 O2 Cu1 138.59(14) . . . . ? 
O3 Te1 O2 Ho1 -28.7(4) . . . 1_455 ? 
O1 Te1 O2 Ho1 -116.0(4) . . . 1_455 ? 
Cu1 Te1 O2 Ho1 151.6(5) . . . 1_455 ? 
Ho1 Te1 O2 Ho1 -69.8(4) . . . 1_455 ? 
O1 Cu1 O2 Te1 -27.44(19) 2_656 . . . ? 
O1 Cu1 O2 Te1 152.56(19) 1_455 . . . ? 
O2 Cu1 O2 Te1 45(21) 2_556 . . . ? 
O4 Cu1 O2 Te1 64.69(18) . . . . ? 
O4 Cu1 O2 Te1 -115.31(18) 2_556 . . . ? 
Te1 Cu1 O2 Te1 180.0 2_556 . . . ? 
Ho1 Cu1 O2 Te1 165.1(3) 1_455 . . . ? 
Ho1 Cu1 O2 Te1 -14.9(3) 2_656 . . . ? 
O1 Cu1 O2 Ho1 167.49(16) 2_656 . . 1_455 ? 
O1 Cu1 O2 Ho1 -12.51(16) 1_455 . . 1_455 ? 
O2 Cu1 O2 Ho1 -120(21) 2_556 . . 1_455 ? 
O4 Cu1 O2 Ho1 -100.38(16) . . . 1_455 ? 
O4 Cu1 O2 Ho1 79.62(16) 2_556 . . 1_455 ? 
Te1 Cu1 O2 Ho1 14.9(3) 2_556 . . 1_455 ? 
Te1 Cu1 O2 Ho1 -165.1(3) . . . 1_455 ? 
Ho1 Cu1 O2 Ho1 180.0 2_656 . . 1_455 ? 
O3 Te1 O1 Cu1 100.2(2) . . . 1_655 ? 
O2 Te1 O1 Cu1 -159.3(2) . . . 1_655 ? 
Cu1 Te1 O1 Cu1 -119.80(18) . . . 1_655 ? 
Ho1 Te1 O1 Cu1 105.8(2) . . . 1_655 ? 
O3 Te1 O1 Ho1 -5.59(15) . . . . ? 
O2 Te1 O1 Ho1 94.90(16) . . . . ? 
Cu1 Te1 O1 Ho1 134.39(10) . . . . ? 
O2 Ho1 O1 Te1 109.85(17) 1_655 . . . ? 
O6 Ho1 O1 Te1 178.8(2) 1_754 . . . ? 
O3 Ho1 O1 Te1 44.0(2) 2_765 . . . ? 
O3 Ho1 O1 Te1 4.93(13) . . . . ? 
O5 Ho1 O1 Te1 -165.33(17) 2_656 . . . ? 
O7 Ho1 O1 Te1 -51.46(18) 1_654 . . . ? 
O5 Ho1 O1 Te1 -102.10(16) 1_654 . . . ? 
S1 Ho1 O1 Te1 -77.90(14) 1_654 . . . ? 
Cu1 Ho1 O1 Te1 120.6(2) 1_655 . . . ? 
Ho1 Ho1 O1 Te1 23.21(14) 2_765 . . . ? 
O2 Ho1 O1 Cu1 -10.74(14) 1_655 . . 1_655 ? 
O6 Ho1 O1 Cu1 58.3(3) 1_754 . . 1_655 ? 
O3 Ho1 O1 Cu1 -76.60(19) 2_765 . . 1_655 ? 
O3 Ho1 O1 Cu1 -115.67(18) . . . 1_655 ? 
O5 Ho1 O1 Cu1 74.08(15) 2_656 . . 1_655 ? 
O7 Ho1 O1 Cu1 -172.05(13) 1_654 . . 1_655 ? 
O5 Ho1 O1 Cu1 137.30(15) 1_654 . . 1_655 ? 
S1 Ho1 O1 Cu1 161.50(11) 1_654 . . 1_655 ? 
Te1 Ho1 O1 Cu1 -120.6(2) . . . 1_655 ? 
Ho1 Ho1 O1 Cu1 -97.38(12) 2_765 . . 1_655 ? 
 
_diffrn_measured_fraction_theta_max    0.990 
_diffrn_reflns_theta_full              27.47 
_diffrn_measured_fraction_theta_full   0.990 
_refine_diff_density_max    2.378 
_refine_diff_density_min   -1.549 
_refine_diff_density_rms    0.275 
